# Supplementary material for: Social Distancing among Medical Students during the 2019 Coronavirus Disease Pandemic in China: Disease Awareness, Anxiety Disorder, Depression, and Behavioral Activities
Source: MDPI journal article supplement (doi:10.3390/ijerph17145047), 2020-07-14
Supplement: s1 [file s1]

**Table S1.** Preventive knowledge of COVID-19, comparing correct answer frequencies between the two universities ( $N = 933$ ).

| Questions                                          | Answers                            | Number (%) |               |             | $\chi^2$ | $p$  |
|----------------------------------------------------|------------------------------------|------------|---------------|-------------|----------|------|
|                                                    |                                    | Overall    | Beijing (558) | Wuhan (375) |          |      |
| How long is the incubation period of COVID-19?     | 1~14 days*                         | 907 (97.2) | 540 (96.8)    | 367 (97.9)  | 0.99     | 0.32 |
| Which is not true about the mortality of COVID-19? | 15~21 days                         | 24 (2.6)   | 16 (2.9)      | 8 (2.1)     | 4.18     | 0.04 |
|                                                    | 22~30 days                         | 2 (0.2)    | 2 (0.4)       | 0           |          |      |
|                                                    | Wuhan is higher than other regions | 153 (16.4) | 93 (16.7)     | 60 (16.0)   |          |      |
|                                                    | Lower than flu*                    | 626 (67.1) | 360 (64.5)    | 266 (70.9)  |          |      |
| Which are susceptible groups for COVID-19?         | Lower than H7N9                    | 51 (5.5)   | 31 (5.6)      | 20 (5.3)    | 0.20     | 0.66 |
|                                                    | Lower than SARS                    | 103 (11.0) | 74 (13.3)     | 29 (7.7)    |          |      |
|                                                    | Children                           | 4 (0.4)    | 2 (0.4)       | 2 (0.5)     |          |      |
|                                                    | Young people                       | 3(0.3)     | 3 (0.5)       | 0           |          |      |
|                                                    | Middle aged and elderly people     | 279 (29.9) | 163 (29.2)    | 116 (30.9)  |          |      |
| What drugs cure COVID-19 effectively?              | All people*                        | 647 (69.3) | 390 (69.9)    | 257 (68.5)  | 0.23     | 0.63 |
|                                                    | Oseltamivir                        | 87 (9.3)   | 49 (8.8)      | 38 (10.1)   |          |      |
|                                                    | Antibiotic                         | 10 (1.1)   | 7 (1.3)       | 3 (0.8)     |          |      |
|                                                    | Glucocorticoid                     | 2 (0.2)    | 1 (0.2)       | 1 (0.3)     |          |      |
|                                                    | No effective drugs*                | 834 (89.4) | 501 (89.8)    | 333 (88.8)  |          |      |

Note: \* means correct answer. The Chi-squared analysis is performed only between correct rates.

**Table S2.** Direct and indirect coefficient values in standardized estimation from the path analysis model ( $N = 933$ ).

| Factors          |                                      | Direct coefficient | Indirect coefficient | Total coefficient |
|------------------|--------------------------------------|--------------------|----------------------|-------------------|
| Anxiety disorder | Negative thoughts or actions         | 0.87               | -                    | 0.87              |
|                  | Age (ref = age $\leq 24$ )           | -0.07              | 0.06                 | -0.02             |
|                  | Grade (ref = undergraduates)         | 0.07               | -0.05                | 0.02              |
|                  | Anger and quarreling behaviors       | -                  | 0.3                  | 0.3               |
|                  | Concerns about the COVID-19 epidemic | -                  | 0.26                 | 0.26              |
| Depression       | Negative thoughts or actions         | 0.86               | -                    | 0.86              |
|                  | Healthy lifestyle                    | -0.08              | -                    | -0.08             |
|                  | Anger and quarreling behaviors       | -                  | 0.29                 | 0.29              |
|                  | Concerns about the COVID-19 epidemic | -                  | 0.26                 | 0.26              |
|                  | Longer video screen time             | -                  | 0.02                 | 0.02              |
